# Supplementary figures and images for: Fyn and TOM1L1 are recruited to clathrin-coated pits and regulate Akt signaling
Source: PubMed Central journal article supplement — J Cell Biol. 2022 Mar 3;221(4):e201808181. doi: 10.1083/jcb.201808181 (PMC8899389; doi:10.1083/jcb.201808181), 2022-03-03

Figure 1A

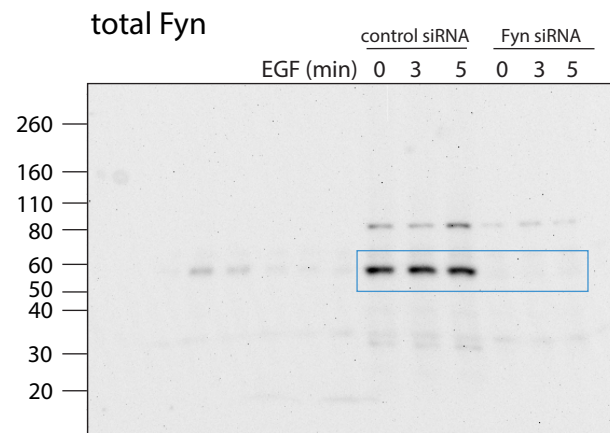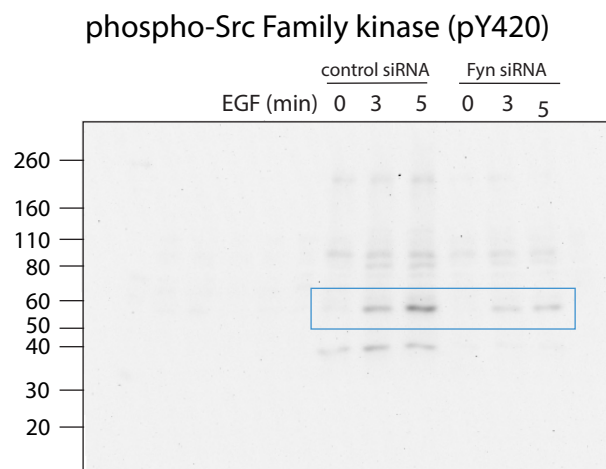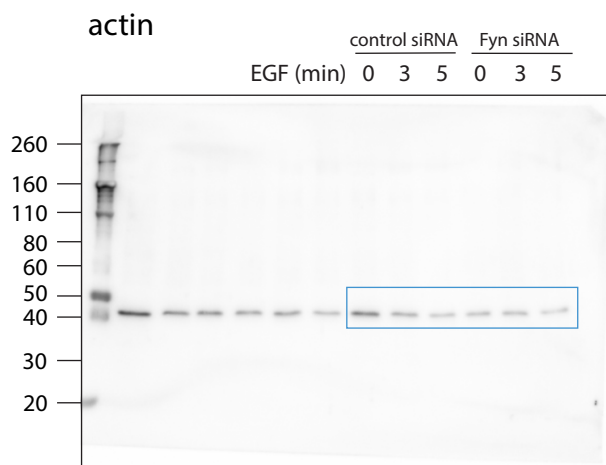

Figure 1B

pGab1

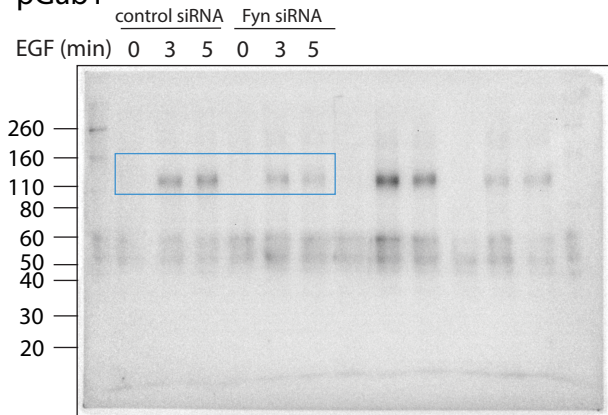

phospho-Akt (pS473)

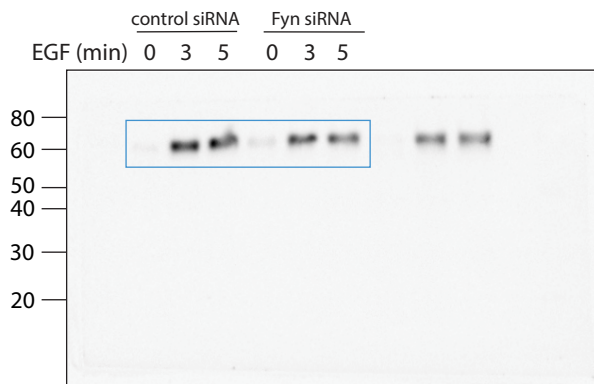

Fyn

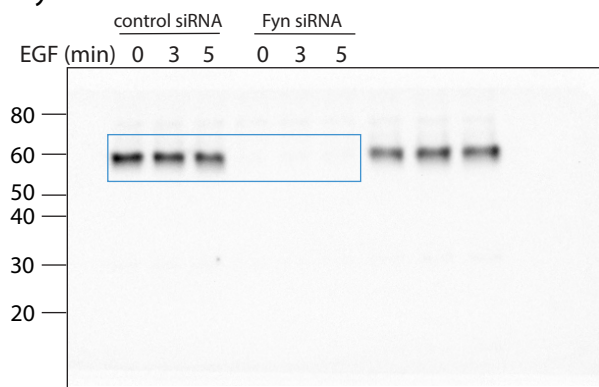

total Akt

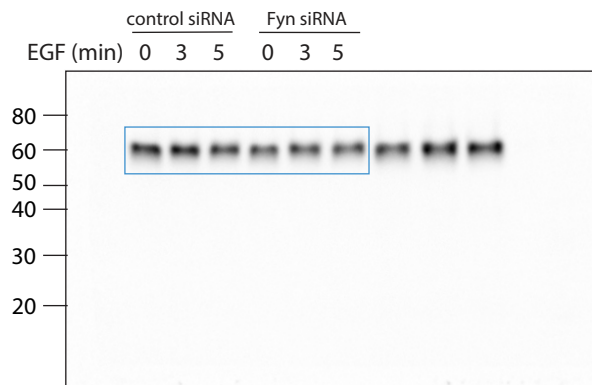

actin

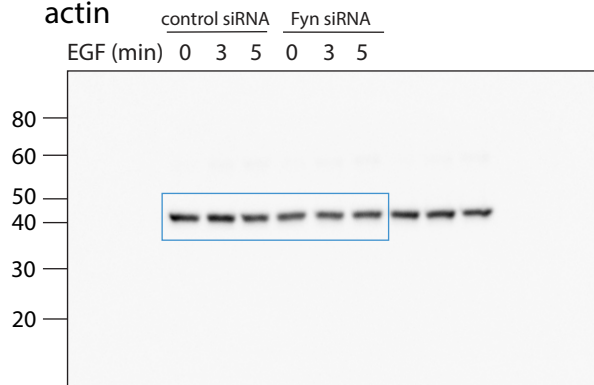

Figure 1D

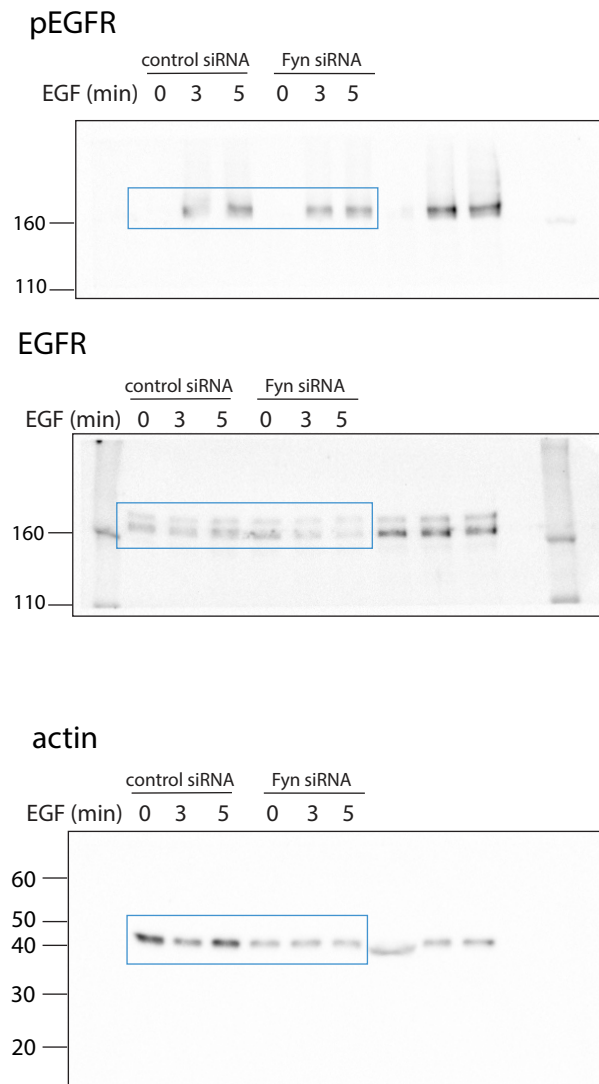

Supplement: JCB_201808181_SourceDataF1.pdf [file JCB_201808181_SourceDataF1.pdf]

Figure 2A

pAkt (pS473)

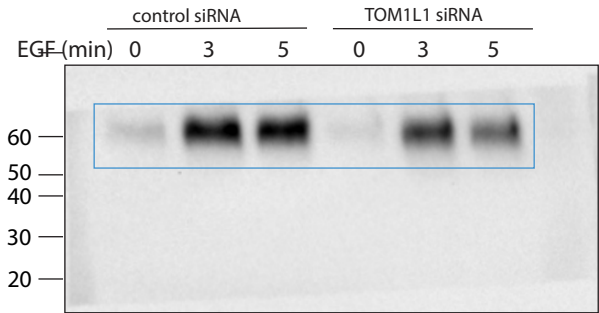

total Akt

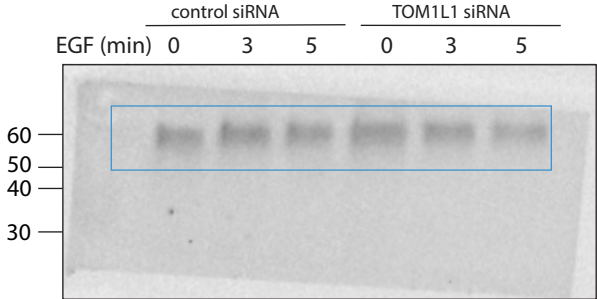

actin

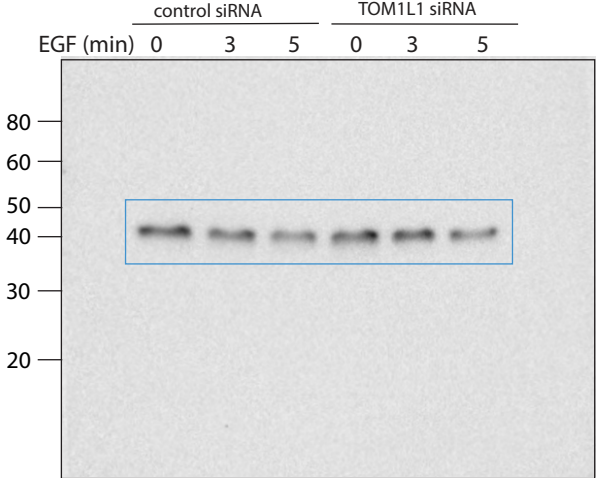

TOM1L1

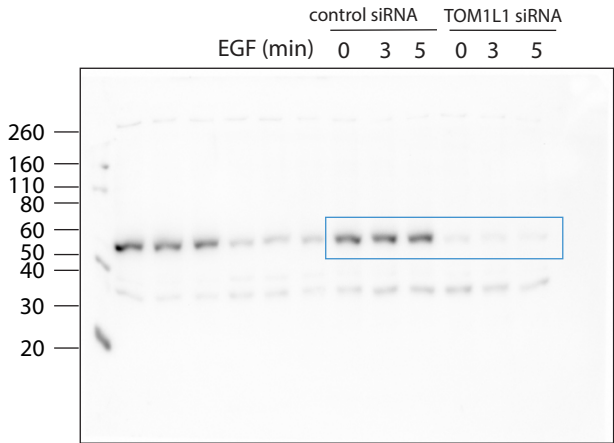

actin

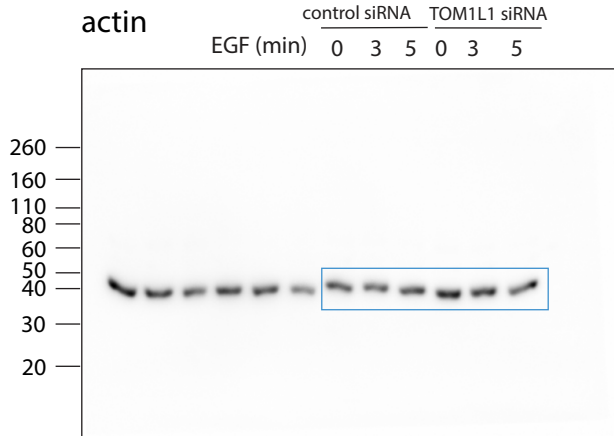

Figure 2C

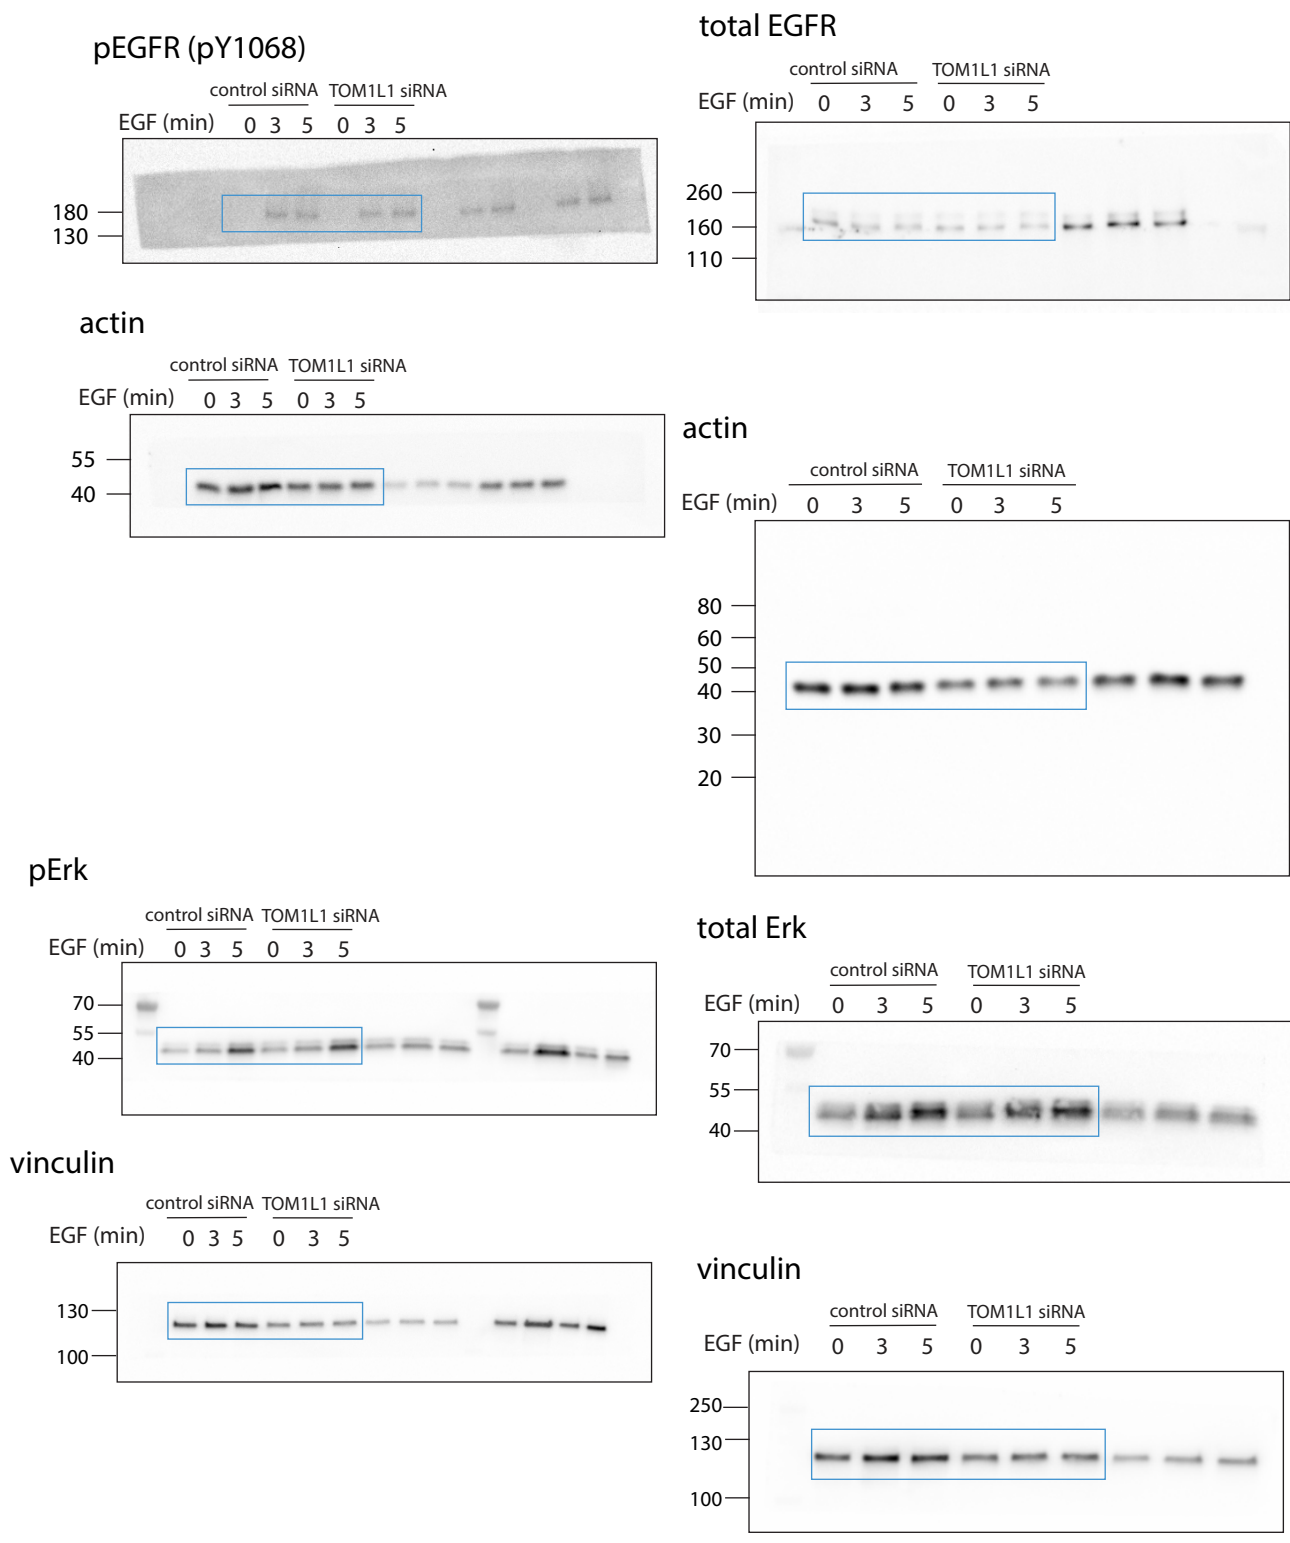

Figure 2D

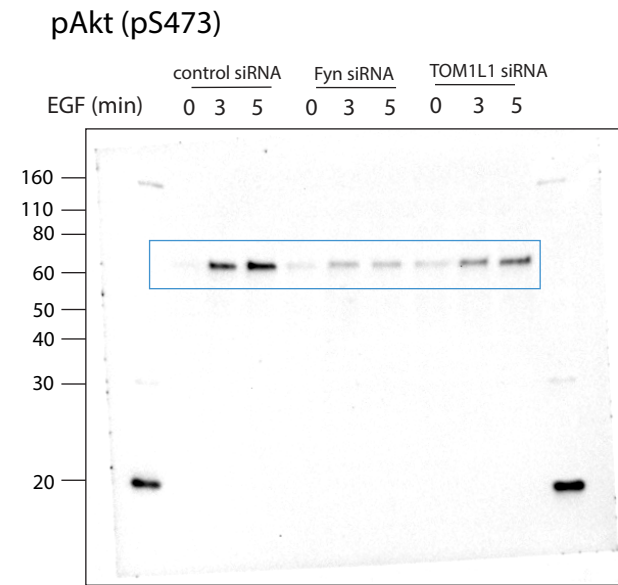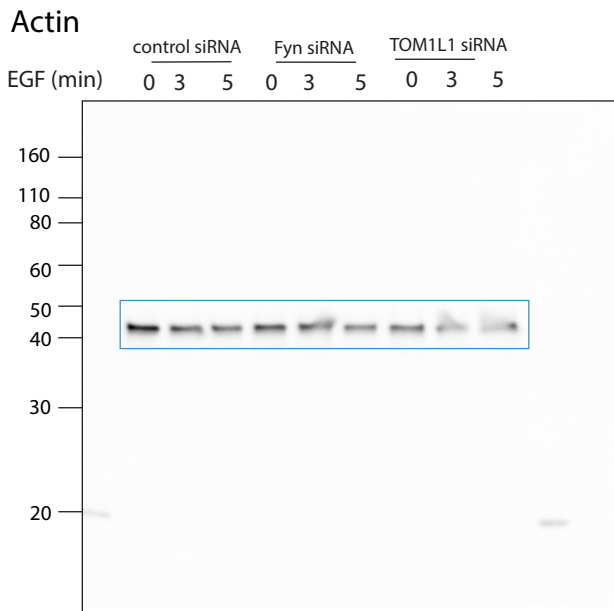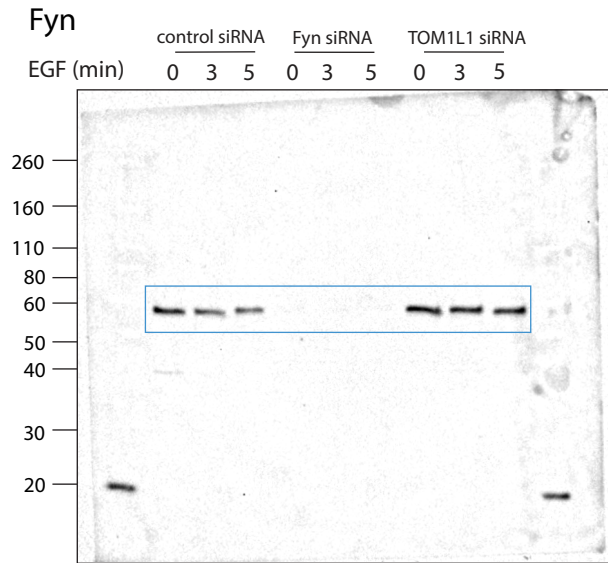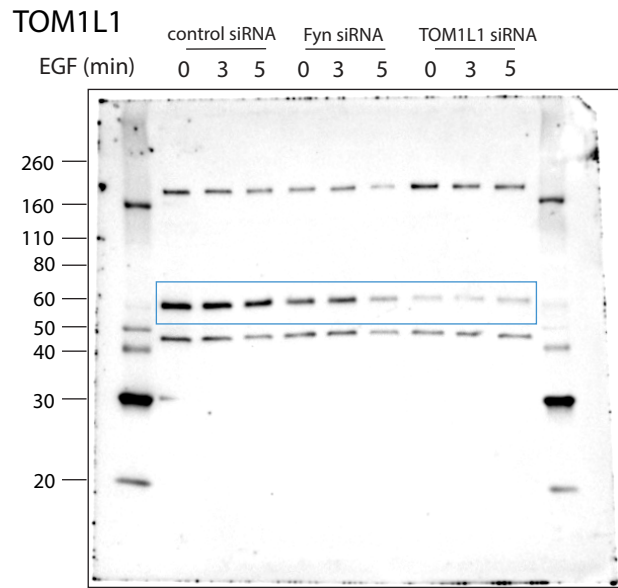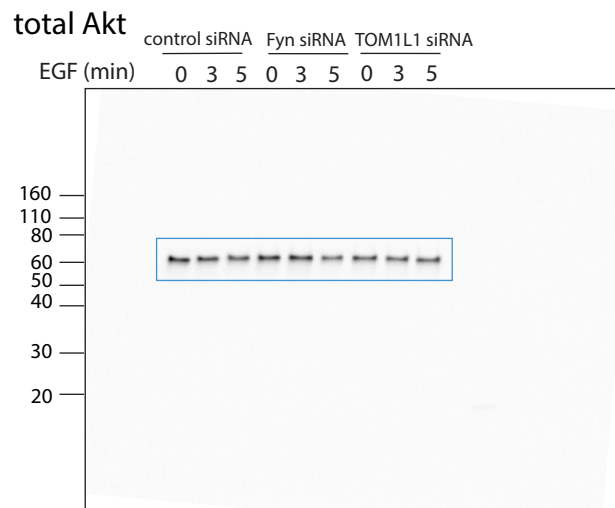

Supplement: JCB_201808181_SourceDataF2.pdf [file JCB_201808181_SourceDataF2.pdf]

Figure 8

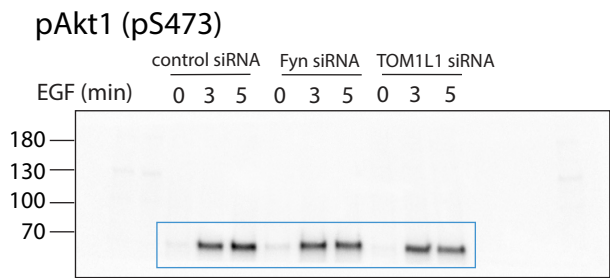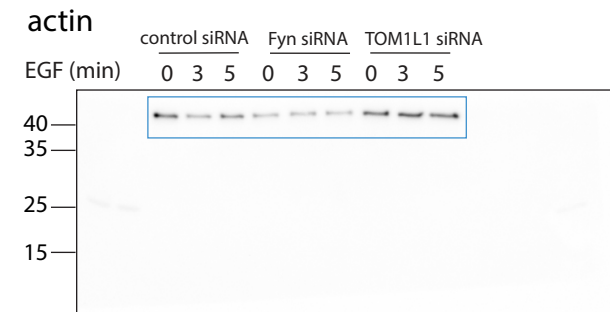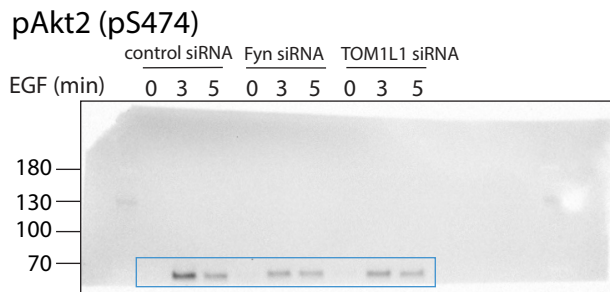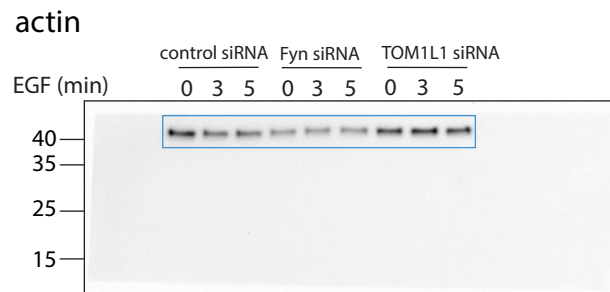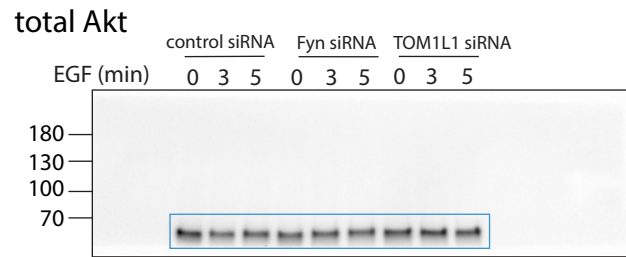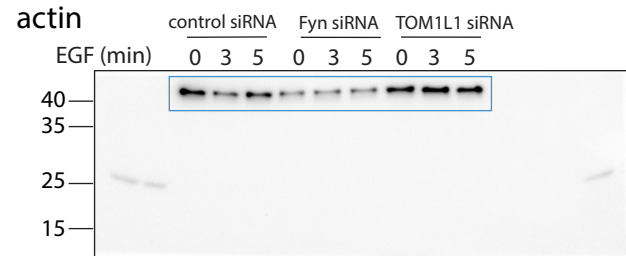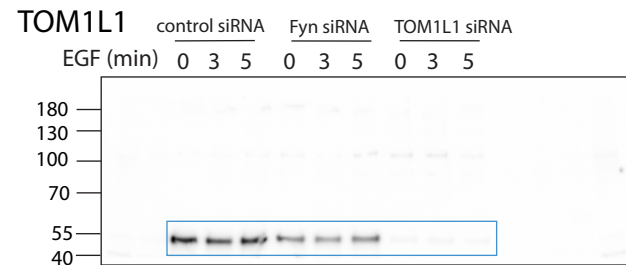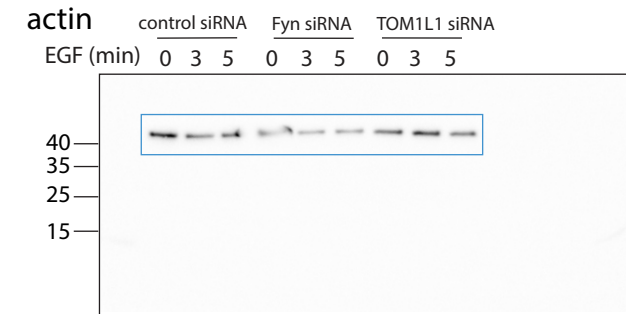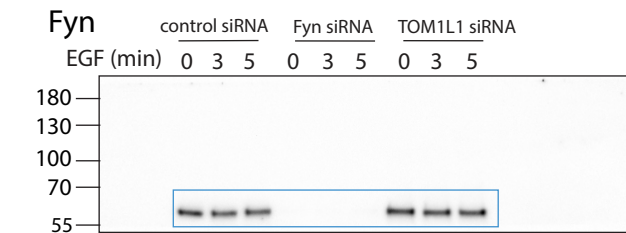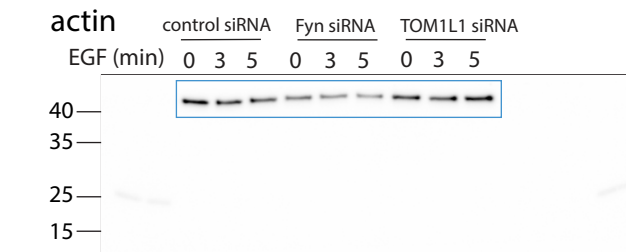

Supplement: JCB_201808181_SourceDataF8.pdf [file JCB_201808181_SourceDataF8.pdf]

Figure S1

pGab1 (pY627)

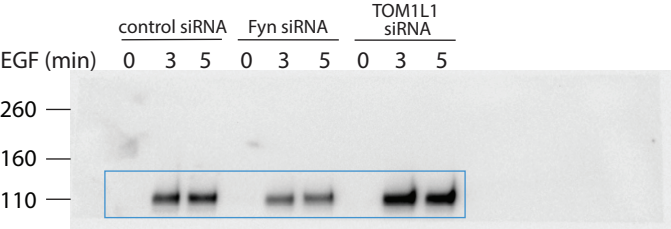

Actin

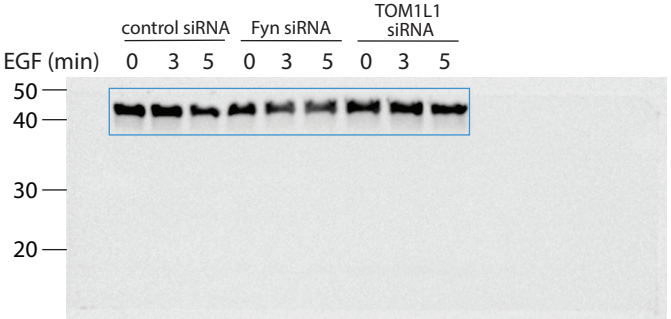

Supplement: JCB_201808181_SourceDataFS1.pdf [file JCB_201808181_SourceDataFS1.pdf]

Figure S2

### TOM1L1

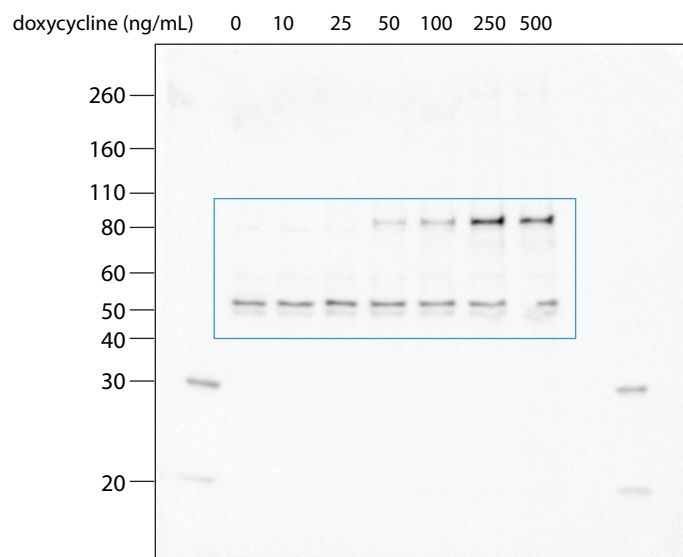

### Fyn and actin

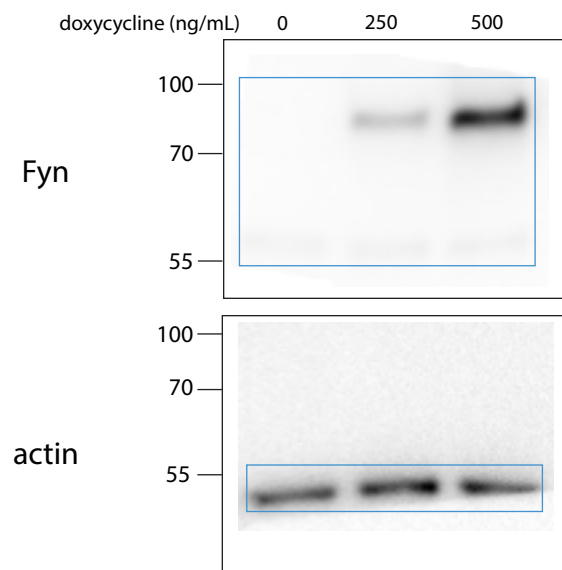

Supplement: JCB_201808181_SourceDataFS2.pdf [file JCB_201808181_SourceDataFS2.pdf]
